# Supplementary material for: The Role of Polymorphisms in Vitamin D-Related Genes in Response to Vitamin D Supplementation
Source: PubMed Central journal article supplement (PMC7551134; doi:10.3390/nu12092608), 2020-08-27
Supplement: nutrients-12-02608-s001.pdf [file nutrients-12-02608-s001.pdf]

**Supplementary Table 1. SNPs ID and related sequences.**

| Target Name | Sequence                                                                                                                                                                                                               |
|-------------|------------------------------------------------------------------------------------------------------------------------------------------------------------------------------------------------------------------------|
| rs2298849   | ATTCTTTAATGTTTCAAGGGACATCTGCATTTATCCTGCTTTGTAAAATTAAGGTTTTCATTTAGTGCTGTGTCAGTTAACA<br>GCCTCACCTAATTCGTACA[C/T]TATTATTCATAATAGTAATGTGTTTTGCCAGTGGAATAAAATGTGTGTTCCCAAGAAT<br>TATCAGTTATTAACGTAAACATGAATAACCTTACTCTTGACT |
| rs12512631  | TACTACTATTGTTAATTGCAAAC TAGAATTTCCAGAATGCTTTAGCTATGAACTAGTAGCCTTGTGGTGGTGGTTGTC<br>ATGGAAGAAACAATTAGATG[C/T]TTTCTTGGCCTAATAGAGAGAAAAGAATATTTACAGTCTGGAAAAATGGACA<br>AGGATAAAATAGCCTCTGGGAAAGAGAATCTTTTGACCTGATTATC     |
| rs16846876  | TTTTCGTTTGTGGATTTTGTGTATTTTCGCAACTTAAATGCCTTGTGAGTTTGAATTGTAATATATTATCCCTACCTG<br>CACATGCTGTGAACTTT[A/T]TTCATGATGCTTTTGTGAACAGAACTCTAAACTTGATAATAAAATTTMATCAATATT<br>TTGCCATTGATTTGCCTCTTGAATTTTCTTAGGTAGG             |
| rs17467825  | AAATGGAACAAATGACATCATTATGCATATTAGATCTAACATTA AAAACTCTTTACTAAAATTACAATATTTCTGTCAGCG<br>ATTCTTAATAAAGAAAA[A/G]TGGTGAAATGTGTTAGAGTGTGCTGGAAAATATATCCATGGGAACTATGAAAACC<br>CTACTTCAGTGAATTGTATATTTATTGACTACTTTGTGACA AWA   |
| rs3755967   | TGATGAAGGCCTACCAATGTTCAATTATTT CAGGAATAGTTACATGGCTTTGAAAAAGCAAATTATACCTTGTTCACAAA<br>GTTATAGGTCTGAGGTACTT[A/G]ATATCCAGAAATAATGAGACCACAACCTTACCCTTATCTTAGGTTTCCAGAACAC<br>AACCAACTCATTGCAGTTCCTGGGTTCCAGGGAGAATTTGTAG   |
| rs2298850   | AAAAGACCCATTTGCCTACAGAAAAACCTATAGTTACAAAATTAGACTTGAAATCTTCTTTCTCTTCTACCATCATTCA<br>GGCAGGGCATCCCTTTGGG[C/G]TCTTCTGAGAACTACTACTATGCTTCTTTAAAATGTTTCAACAGACTGCTAGTGA<br>GCATCAGATATGATTTCCCAAAGTATCCAAAAGTCATTGTAA       |
| rs731236    | GGTGGGATTGAGCAGTGAGGKGCCAGCTGAGAGCTCCTGTGCCTTCTTCTATCCCCGTGCCACAGATCGTCTGG<br>GRTGCAGGACGCCGCTGAT[C/T]GWGGCCATCCAGGACCGCTGTCCAACACACTGCAGACGTACATCCGSTGCCG<br>CCACCCGCCCGGGCAGCCACCTGCTCTATGCCAAGATGATCCAGA            |
| rs10783219  | TGCCTACCTTGCCTTCTGGCTGCTTACCTGCTTTACAGCCAGACTTTCTGTGGGATAGTGTGGTCCCCAGAGGTCTGG<br>GAAGCTGGATGAGCAAAATG[A/T]GGAGGCTGTAGATATGGAGGAAGAGGGGAAGAGGAAACGTGAGGCCAGTCTT<br>GGCTCCACTATGAACCCCAATTTCCCAGGGGAAGCTGAAGAGGAGTT     |
| rs7139166   | AGAAACAGATGAAGTGCCCTTTAGAGGTCTGCCAGTCTGATGGATGGATTCTCTACCTGTAATGAAAGTAATAGGA<br>AGGATCCCTTGGCCAAAGCAT[C/G]GTGGGAAAGCTAGCGGTGATTCTTGTGGGAAGAAAAGCATAAGAGGAAATTT<br>CCAACCAACATACCTTGGGACATTCTCTGCAAGTCCCATGAGCCTCT      |
| rs4516035   | GGAGAATGTATAAATAAATAGTAATTACAACATAATCTTCTGGAATAGAAATGCTCACAAAATCATCCAGCAGTCGATG<br>ACCTCTTTAGCCAGGGAAGA[C/T]ATTGCTATTCGCTCTTACAGAGGAGGAAACCATGGCTCAGAGGGACAAGGTG<br>AAAGGGTGGGAAATTGAGGCATAGAAAGTTAAGTGATATGCCAAC      |
| rs757343    | AGGTTTCTTGCGGGCAGGGTACAAAACCTTGGAGCCTGAGAGATGTTTCTGCCTATATAGTTTACCTGATTGATTTTGG<br>AGGCAATGTGCAGTGACCTT[A/G]ACCTCTCCGCTGGTTAGAGGTGAGAAGAGGGAGAAAAGGCCGAAGAGGAAAG<br>TTATTGTGACCTTGGGACATGATGTCGGTGATGAGGTCCAAAGAGGG    |
| rs703842    | AAGAATACAAGATCCCGTCTCCAGGCAGTGACCTCCAAACCAGCCTGCCTGGTCACTGACTGCTTACTCTACCTTAGC<br>TGGACCTCGTCTCCAGGGA[C/T]TAGAGAAAAGAGCAGGAGTCTGGGTCTCCAGTTGAGACTGCTGGAGCTGAG<br>ACACAGTACTCTTAAAGAAGGTGGGGAGCTGCCAGGGCAGAAC           |
| rs4646536   | CAGGGAGATAGCAGAGAAAAATGGCCCTCTACTCCTGGCCAAAAGGGTTTTGGAAGTTGAAACAATGAGAAGGGGG<br>CTGCAGCCCTAGCCTCATCTTG[C/T]TGTCTCATTGTTGTGCTTTGCAACCTAGACTGTACYCTGTGGTACCTGGA AATT<br>CTSRGTGCCAGACAAAGACATTCATGTGGGTGACTATATTATCCC    |
| rs10877012  | AGCCCGGGAGGTCAAGGCTGCAGTGAGTTATGATTGTACCACTGCACTCCAGCCTAGGCAACAGAGAGAGGGCCTGTC<br>TCTAAAAAAATTAATAAATAAA[A/G]AATCTCCACAGTTTACTCTCTGCTCTTACTCCCTCATTCCCCTGCAACTCT<br>ATCAGGCTCTGTGCCAGTCAGCTAGCTCTGAAGTTCTGGAATTG       |
| rs1562902   | CTACAAGTGTGCATAACATAGGAAATGTGATCAGTCTTGGAGGTGAGTAATTGATGCTGCACAAAACAACCACTTAT<br>ATCCAGGGACTCCCCATGAT[C/T]GTGTTTATGGAAGATGTTACTACAATTCTTCCCTATCAACTGGTCTCATATGGAC<br>ACTGAGTGAAGGGAAAGGAAAGTAACAAAATCTCTRTTAAAAT       |
| rs10500804  | CATGGCACTATTTAACACTATCTTGAACCAGAAACATTCATATTTCTTGTCTTCTGCCTGCATGCTAAAATTACAAACTCCTT<br>AGGAGCAGTGATTTATC[C/G]TTTTTCTTTGAACTCTTACACAGAATCTCATTGCTGCTGTGCATAAAGTTCTCAAT<br>AAATGCTGTA AAAATAAATAACGCTGTCAATTCTACTT       |

|            |                                                                                                                                                                                                                 |
|------------|-----------------------------------------------------------------------------------------------------------------------------------------------------------------------------------------------------------------|
| rs10741657 | AGAGCAATGACATGGAAATACAATAATTTTCAATAATCAGAAGCAAACAAAAAGTGC GTTATAGAAAACGCCTGGTGG TTGGGGAGATACTTTAGCAGGC[A/G]AGGGCTGTCAAGGAAAGTCTTATTAGGAAGATGACATTGGAGCTGAGATCAA CTGCTAAAGAAGTGATTTGTTTCTACTACTGTTGTAATAAATTACC  |
| rs10766197 | AATAGCAGTCCCTTAATAGAAGGCTTTTGGCTGTCTCCTTCAAAAACCATAATCTCTGTACAATTTGGAACACTCCAGTT AATTAGAGATCTTTAAACT[A/G]TGCCAAGATACAGAAAGGACCAAGCTTTAAAAAATATTGTCTCCACATGGATTGG TCTAAAAGCAGTATTTAACCTAAGCTYTGAATACAGTTTTAC     |
| rs12794714 | AGCCCGGGCCAGCCTGGCGGCCCTCCCTGCCCGGGGCCGTCGGGGCTGTACCTCTCCGTACACCTGGCTCTGCTTTCT CATGTAGACATGGGGAAAGCTC[A/G]GATGAGGCTGCCAGGGAATAGATGTTGCCGATAAATGGCAGCCCCGGCGGCC CCGGGGGGAAGCCCATCGGCCCTCTGCTTCAGCAGCTGGCGGACCC   |
| rs7116978  | TTAAAATTATTTTCATAGTTGTATAGTCTTATTCACITTAATTTTTAAATAAAATTCATTTAAGTGCTTAAGTACCTTTTAT AGGTAAAAGATTATCTAA[C/T]ACAATACTTTGAATGTGATTCTTAAAGACTTCTATTTTGAAGTCTCTCAAAAAAATG CCATATGAATGGGGCTCTAGACTTCTATTAAGTTTCAATC    |
| rs1993116  | TTATTGAGAACTTTATGCACAGCACTGAATGAGATTCTGTGTAAGGATTCAAAGATGAAAAMGATGAAATCACTGCTCC TAAGGAGTTTGTAATTTAGCA[C/T]GCAGGCAGAAAGACAAGAATGAATGTTTCTGGTTCAAGATAGTGTAAATAAG TGCCATGGGAGCTTCAAGCTCCCATGTGTGGTTCAAAGCAGAGAG    |
| rs3829251  | TGTGCTCACCAGGTTGTGCAGCAGTCCCTGGGAGTTGGCTGCAGGCTGGCTCCTACCCCTCTCCTTTCTCTCCCTGC CCTACTGCCTCTCCACGG[A/G]CAGTTCTCTATGTGAGGACAGTGAAGGAGGGCACCTTTCCRGAGAAGRAAGACT GGGTCTACTAGAAATTTCCATCCATAATGGCTCCTAGGAGAAA         |
| rs12785878 | TGTTCTTAAATTTGTCTTCAATTTGATTGATTCTTTAAGAAATCTTTCACCTAAGTGCCAAGGGATCTAGGGTTCTGGGCTG TCTGATATCACAAAGCTT[G/T]ATCCTCTCCTGGCCCGTGCCGGATCTTCTCCTGGGCTGGACTCAAGGCTGATCG TCTCGTGAGCCTGACCTCTCTGGGCTGGTCCGGGGCCTGAT      |
| rs11234027 | CTGGTGACATGTTGCTGTATTCTTGGGTGAGAATGCTRAGGACATGCTGCTGTATTCTTGGGCGAGTACATTGGTGACA TGCTGCTGTGTTCTTAGTGA[A/G]TACACTGGTGAACAATGCCAATCKCACGGCCAAGAGWTTTGAGGAGCAGGG ACATCTGGTAAGCAGACTTCAGTTTCTTTTCAGTAATGTGCCCTCT     |
| rs2244719  | AAGCCATTACCAGAGGAAGAGAAGGGAAGGGAATAATTATGTTCTAAACACCCATTACACGCCAGGTAAGTGGGCTAG CACTTCATATAGGGTTTTTTTT[C/T]CTTCCATTTTCATTTTATTTAGAAGGAACCTTTTTACAAAATAAAATTTCTCAACTC TTCATTTCAAAACTTTTTACCTAGAGAAAAGTTGAAGGAATGG |
| rs2296241  | ACGACAACCTACTTTCAAACGACCATTTGTTTCAGTTCCGTGTACAAGTCTTCAACGTGGCCTCTTTTCATCACAGAGCTCAT CTATTTGCCATAAAATC[A/G]GCCAAGACCTTCAAAGAAAACAACCGCAAAGACACATTTTAAAGCCGTTGAAGGA AAACAAAACCTTAAAGCTCACTGAGCTAACTTCAGGTCTTGCTA  |
| rs2426496  | GCTTGGGCTGAAACCATGGCTCCACCCTCATTAGCTGTGTGATCTTGGGCAAGTTATTTAACTTCTCTGAGTCTAGTTT CCTTAATGGTAAAATTGGAG[G/T]TACTATACCTGTGTCTCAGGAAGGTCAAGATAAATACTAAAAATATTAGACAAA ACACGATTGTCTTCACTAAAATCTGTTTGGCCTCTGACTTGCTT    |
| rs4809960  | GGCATAACTTAAGCACCTAAAAGAAGCATTAAAAGGGCTGCTCTGGCCTTTCCTAGGCAGCAATAATGCCTGTTTACA AAAGAGTTGTCAAAGAGCCA[C/T]GTTTTATCCGCAAATCACCTGCAAATCAGTGAGCAAGTCTGTGACGACAACCT TACTTTCAAACGACCATTTGTTTCAGTTCCGTGTACAAGTCTTCAAC   |
| rs4588     | AAATTTGTATAAAATAAATACATGTAGTAAGACCTTACATTTAAATGGTTTTTCAGACTGGCAGAGCGACTAAAAGCAA AATTGCCTGAKGCCACACCCA[A/C]GGAAGTGGCAAAGCTGGTTAAACAAGCACTCAGACTTTGCCTCAAAGTCTGCTTCC ATAAACTCACCTCTTACTGTGATTAGAGGTAGGAAAATGT     |
| rs17219315 | TTAGCATCAGAATATTTGGGATAAAATAGTGATCATCTTTTGACAATAGTTTGACAATAGGATGAAAAAGCACCTTTCTC CTAGTCAAAGATTGCACCA[A/G]AAAGTTGAAGTCCAGATAATTTGGGTTGAGGGATTTTGGAGTGTCTTGCAGGGA GTGGGGCTGGGAGGCCTGGGACAATTCCTAGCGGTAAAAGGGGG    |
| rs6013897  | CTCTGCCACTTACCTACTGTGTATCTTTGGGTAGGTTACTTCTGCCTCTGTCTTGGTTTCTCATCTGTAAAAGGGGGATA ATGAAAGTACCTACTTCAAG[A/T]GGATGATTACACTTCTTACATGCATTTACGAGTTTTCTGAACATATAATCTGTG AGATCCATGTGGACTTGATGATTCTAATTTTGTGATGCAT       |
| rs7041     | TTTTGCATTAGAAATTTGTATAAAATAAATACATGTAGTAAGACCTTACATTTAAATGGTTTTTCAGACTGGCAGAGCGA CTAAAAGCAAAATTGCCTGA[G/T]GCCACACCCAMGGAAGTGGCAAAGCTGGTTAAACAAGCACTCAGACTTTGCCTCC AACTGCTGTTCCATAAACTCACCTCTTACTGTGATTAGAGG     |
| rs229624   | CATGCCTCCTCTCATGTCGTTGATGTACCAGGCCACACAGGTCATGGTGTCAATGGCATCCTCCACCACCTCAAACCCA TCCTCTTCTCATCAAATG[C/T]TTGGCAATTTCTGCGCAGAAGATAGACGCTTAGGTGCCCTGACCCGAAGGCCCT GCCCTCCCAGGCCCTAGGTGCTTGGGAGGACCGAGGGGCTACC       |

|           |                                                                                                                                                                                                                      |
|-----------|----------------------------------------------------------------------------------------------------------------------------------------------------------------------------------------------------------------------|
| rs222020  | GAATAACAAGGGAGAGAGATCACAGAAGAACACAGTAAGAGAAAACGGCAGCTTTACACATCTTGGTAACCAGAGGA<br>GACAACCTTGGCTCACCATGCTG[C/T]CCATTGAATTTTTGNCCATTGAGTTGAGTTTTCTGCTGCTATCTCTTACT<br>AGCTTCTCCTTTCCTGTGTTAGCCCTGGAGGAGGTAGAAGCAGCC     |
| rs2882679 | TGATTTAGGACCATACCACGGAGAGACACAAAGTGGTACCAGAGACCAGCTCATTAAGTTTACCATATACTATGGT<br>AATTTGTTTTAAAAGATATT[C/T]TAAAACAGGTAAGTCAAAGTTTCACATATGGAAATATGTCCAAATTTAAATGTGC<br>TTGTCTCCTGAAGAGTCTGGGTCATTCATTAATAAAAAAAAAAAAAA  |
| rs1155563 | GAACTGATAATATCAAATAACAAATTTACTTTTCGTGTAGTAAAATTTGAAGACTGAAATGGTTATTCTAAGACTGTGCT<br>CTTGCTATTGTANTTTTTAA[C/T]AGATAAAAAATCACAGTTATTTCCATATAAAAAATTTTTCACTCATAAATGGGAGT<br>CGAACAGTGAGAACACATRGACACAGGGAGGGGAACATCACAC |
| rs2282679 | TTCTGACCTTGTGATCCACCCACCTCGGCCTCCCAAAGTGCTGGGATTACAGGCCTGAGCCACCATGCCAGCAAATCT<br>CTGTCTCTAATTATCTACA[A/C]AGCCAGGTATTTTTATTGTTAGCTTTGGAAGCAAGTAGTAGTCCCTCTGGGTTGC<br>CAAAAACATAAATGAATTGGCTCACAGTGTAGAATCAGATTGGG    |

Supplementary Fig. 1

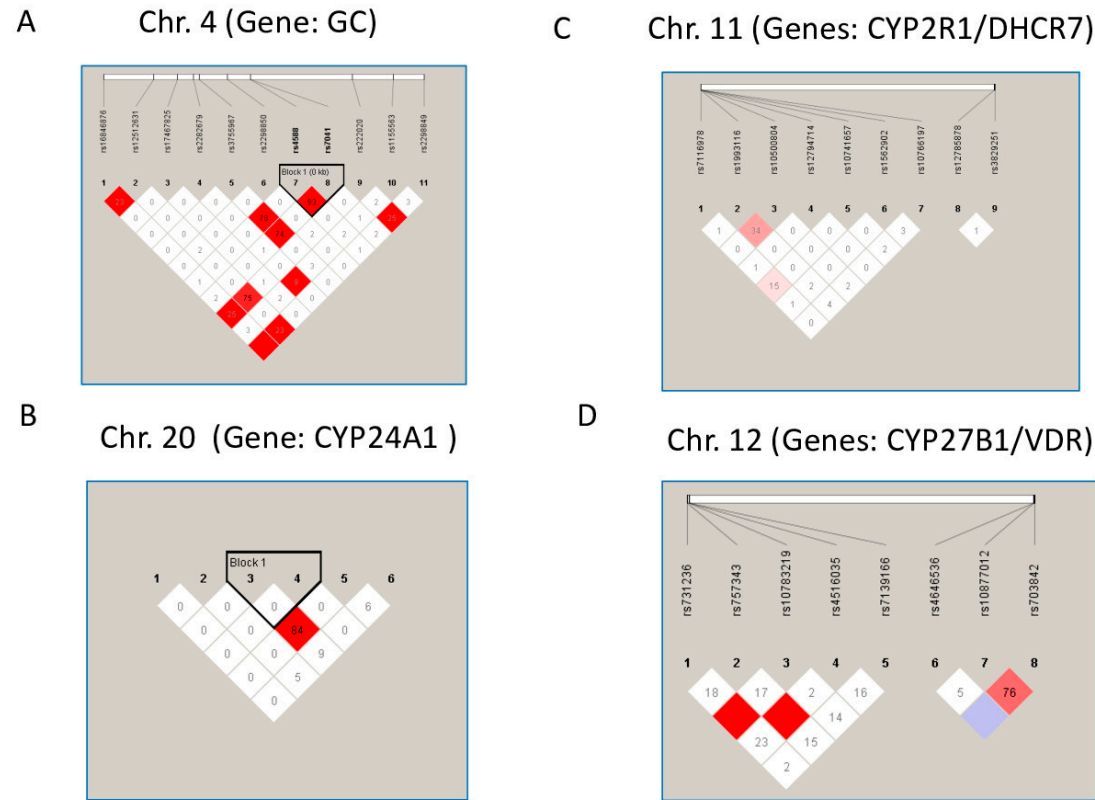

**Supplementary Fig. 1.**  $D'$  pairwise linkage disequilibrium (LD) plots of analyzed polymorphisms in Chromosomes 4, 11, 20 and 12. The red shaded boxes correspond to the paired  $D'$  values between the SNPs.

**Supplementary Fig. 1.**  $D'$  pairwise linkage disequilibrium (LD) plots of analyzed polymorphisms in Chromosomes 4, 11, 20 and 12. The red shaded boxes correspond to the paired  $D'$  values between the SNPs.

Supplementary Fig. 2

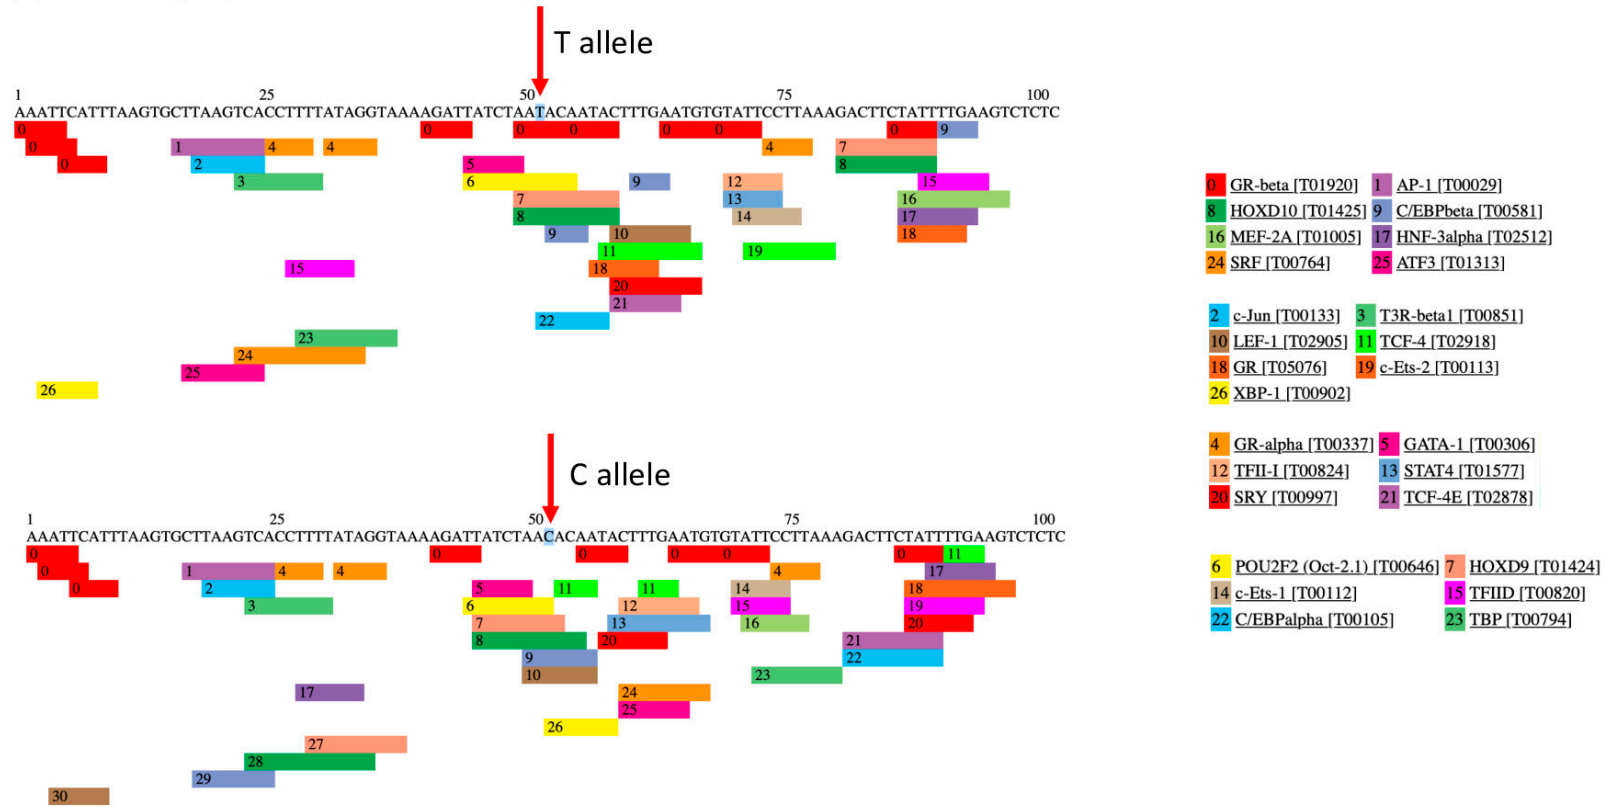

**Supplementary Fig. 2.** Transcription Factor Binding Sites Prediction for intronic SNP rs7116978 (PROMO, [http://algggen.lsi.upc.es/cgi-bin/promo\\_v3/promo/promoinit.cgi?dirDB=TF\\_8.3](http://algggen.lsi.upc.es/cgi-bin/promo_v3/promo/promoinit.cgi?dirDB=TF_8.3)). The red arrows indicate the two different alleles of the SNP. Transcription factors are represented in different colors

**Supplementary Fig. 2.** Transcription Factor Binding Sites Prediction for intronic SNP rs7116978 (PROMO, [http://algggen.lsi.upc.es/cgi-bin/promo\\_v3/promo/promoinit.cgi?dirDB=TF\\_8.3](http://algggen.lsi.upc.es/cgi-bin/promo_v3/promo/promoinit.cgi?dirDB=TF_8.3)). The red arrows indicate the two different alleles of the SNP. Transcription factors are represented in different color
